## The Effects of Volatile Anesthetics on Calcium Regulation by Malignant Hyperthermia–Susceptible Sarcoplasmic Reticulum

Charles F. Louis, Ph.D.,\* Kristine Zualkernan, B.S.,† Timothy Roghair, B.S.,† James R. Mickelson, Ph.D.‡

To clarify the mechanism by which volatile anesthetics initiate malignant hyperthermia (MH), we examined the effect of halothane, isoflurane, and enflurane on  $\text{Ca}^{2+}$  uptake and release by sarcoplasmic reticulum vesicles isolated from MH-susceptible (MHS) and normal pig muscle. Clinical concentrations of these anesthetics (0.1–0.5 mM) stimulated sarcoplasmic reticulum ATP-dependent  $\text{Ca}^{2+}$  uptake (maximal at approximately 4 mM), whereas 10–20 times the clinical anesthetic concentration inhibited  $\text{Ca}^{2+}$  uptake. There was no significant difference between MHS and normal sarcoplasmic reticulum in any aspect of  $\text{Ca}^{2+}$  uptake.  $\text{Ca}^{2+}$  release from  $^{45}\text{Ca}^{2+}$ -filled sarcoplasmic reticulum vesicles in a  $10^{-8}$  M  $\text{Ca}^{2+}$ -containing medium (pH 7.0) was significantly stimulated at clinical concentrations of all three volatile anesthetics (anesthetic concentration for the 50% stimulation of  $\text{Ca}^{2+}$  release = 0.096–0.22 mM); however, the rate constant for  $\text{Ca}^{2+}$  release from MHS sarcoplasmic reticulum was in all cases significantly greater than that from normal sarcoplasmic reticulum. Furthermore, 0.5 mM halothane had no effect on  $\text{Ca}^{2+}$  release from normal sarcoplasmic reticulum at pH values less than 6.8, although it could still significantly stimulate  $\text{Ca}^{2+}$  release from MHS sarcoplasmic reticulum even at pH 6.4; similar results were obtained for isoflurane and enflurane. These studies thus demonstrate that the interaction of volatile anesthetics with the sarcoplasmic reticulum  $\text{Ca}^{2+}$ -release channel is altered in MHS porcine muscle such that the channel may be activated even at a  $\text{Ca}^{2+}$  concentration or pH that would be expected to maintain the channel in the closed state. (Key words: Anesthetics, volatile: halothane. Complications: malignant hyperthermia. Ions: calcium. Muscle, skeletal: ryanodine receptor; sarcoplasmic reticulum.).

MALIGNANT HYPERTHERMIA (MH) is an inherited syndrome of humans and pigs in which affected individuals respond to certain anesthetic agents with muscle contraction and a rapid increase in metabolism, resulting in the production of heat, carbon dioxide, and acidosis.<sup>1,2</sup> Many experimental findings in human and porcine MH suggest that the regulation of skeletal muscle intracellular  $\text{Ca}^{2+}$  concentration is defective<sup>3,4</sup> in the regulation of the sarcoplasmic reticulum  $\text{Ca}^{2+}$ -release channel.<sup>5–12</sup> Genetic linkage studies now indicate tight linkage between the skeletal muscle  $\text{Ca}^{2+}$ -release channel ryanodine receptor gene (RYR 1) and the gene for MH in both humans<sup>13,14</sup> and pigs.<sup>15,16</sup> Although a recent study has demonstrated that this gene is not a candidate locus for MH in some

human families,<sup>17</sup> all breeds of MH-susceptible (MHS) pigs examined to date have an identical mutation in the ryanodine receptor gene.<sup>16</sup> Thus, a working hypothesis is that a mutation (or set of mutations) may cause abnormal regulation of the sarcoplasmic reticulum  $\text{Ca}^{2+}$ -release channel in MHS porcine muscle and an as yet undetermined number of MHS human families.

To demonstrate that the sarcoplasmic reticulum  $\text{Ca}^{2+}$ -release channel defect could indeed be responsible for MH, it is necessary to demonstrate that MH-provoking anesthetics are capable of activating this channel both at clinical anesthetic concentrations and at resting myoplasmic  $\text{Ca}^{2+}$  concentrations. Previous investigations of the effect of volatile anesthetics on MHS muscle have used either intact muscle fibers (for reviews see refs. 1 and 2) or isolated sarcoplasmic reticulum vesicles enriched in the  $\text{Ca}^{2+}$ -release apparatus.<sup>18–21</sup> However, the  $\text{Ca}^{2+}$  dependence of  $\text{Ca}^{2+}$  release from sarcoplasmic reticulum follows a bell-shaped curve, with an optimal  $\text{Ca}^{2+}$  for stimulating  $\text{Ca}^{2+}$  release in the range of 1–10  $\mu\text{M}$ .<sup>22,23</sup> To date, no study examining  $\text{Ca}^{2+}$  release from isolated sarcoplasmic reticulum vesicles has determined the effects of anesthetics on the rate of  $\text{Ca}^{2+}$  release at defined extravesicular  $\text{Ca}^{2+}$  concentrations.

In this study, we examined the effect of three volatile anesthetics on both  $\text{Ca}^{2+}$  uptake and  $\text{Ca}^{2+}$  release by normal and MHS porcine muscle sarcoplasmic reticulum vesicles. We demonstrated that at low concentrations of myoplasmic  $\text{Ca}^{2+}$  ( $10^{-8}$  M) or at pH less than 6.8, clinical concentrations of these anesthetics induce significant  $\text{Ca}^{2+}$  release from MHS but not from normal sarcoplasmic reticulum vesicles. In contrast,  $\text{Ca}^{2+}$  uptake by the sarcoplasmic reticulum vesicles was stimulated by concentrations of anesthetics that induced significant  $\text{Ca}^{2+}$  release. Our results suggest that the sarcoplasmic reticulum  $\text{Ca}^{2+}$ -release channel may be a primary site of action of volatile anesthetics in skeletal muscle. Furthermore, a mutation in this channel that modifies the interaction of volatile anesthetics with this protein could explain the ability of these anesthetics to increase myoplasmic  $\text{Ca}^{2+}$  and trigger the MH response in affected individuals.

### Materials and Methods

#### EXPERIMENTAL ANIMALS

Pigs (29–45 kg) were obtained from the University of Minnesota Experimental Farm, where they were part of a swine genetics herd maintained by Dr. William Rempel

\* Professor, Department of Biochemistry and Veterinary Biology.

† Senior Laboratory Technician, Department of Veterinary Biology.

‡ Assistant Professor, Department of Veterinary Biology.

Received from the Department of Biochemistry and Veterinary Biology, University of Minnesota, St. Paul, Minnesota. Accepted for publication February 28, 1992. Supported by National Institutes of Health grant GM-31382.

Address reprint requests to Dr. Louis: Department of Veterinary Biology, 295 Animal Science/Veterinary Medicine Building, 1988 Fitch Avenue, St. Paul, Minnesota 55108.

for studies of the inheritance of halothane sensitivity. All Pietrain (homozygous for the MH-susceptibility gene) and Yorkshire (homozygous for the normal allele) pigs were obtained and halothane-tested for MH susceptibility as described previously.<sup>24</sup> Pigs were brought to the laboratory no sooner than 2 weeks after the halothane challenge test.

#### SARCOPLASMIC RETICULUM ISOLATION AND ASSAY PROCEDURES

Animals were killed by intravenous administration of sodium thiamylal (Biotol) (15 mg/kg) followed by T61 euthanasia solution. This protocol was approved by the Institutional Animal Care Committee of the University of Minnesota. Sarcoplasmic reticulum vesicles were prepared from the longissimus dorsi muscle,<sup>5,6</sup> essentially as described by Meissner *et al.*<sup>22,23</sup> Briefly, the membrane pellet obtained by centrifugation of the muscle homogenate between 2,600 and 10,000  $\times$  g was resuspended in 0.6 M KCl buffer, incubated on ice for 1 h, and centrifuged at 100,000  $\times$  g. The pellets were resuspended in 0.6 M KCl buffer, incubated on ice for 1 h, and centrifuged at 100,000  $\times$  g. The resulting preparation (termed unfractionated sarcoplasmic reticulum) was used for  $\text{Ca}^{2+}$  uptake measurements. Sarcoplasmic reticulum to be used for  $\text{Ca}^{2+}$  release measurements was further fractionated on discontinuous sucrose density gradients. The vesicles that banded at the 36.4–40.4% sucrose interface after 5 h centrifugation at 85,000  $\times$  g were collected (termed heavy sarcoplasmic reticulum), diluted with  $\text{H}_2\text{O}$ , and centrifuged at 100,000  $\times$  g for 30 min. All sarcoplasmic reticulum samples were resuspended in a small volume of 10% sucrose, snap-frozen in liquid  $\text{N}_2$ , and stored at  $-70^\circ\text{C}$ . All solutions contained aprotinin 1  $\mu\text{g}/\text{ml}$  and leupeptin 1  $\mu\text{g}/\text{ml}$  to minimize proteolysis.

Saturated aqueous solutions of anesthetic in Teflon-sealed Reacti-vials (Pierce Chemical Co.) were prepared fresh daily by 2–4-h equilibration at room temperature. Saturated aqueous solutions of anesthetics were taken as 20 mM halothane, 15 mM isoflurane, and 15 mM enflurane.<sup>25</sup> From this vial, anesthetic in the aqueous layer was added directly to the  $\text{Ca}^{2+}$ -uptake or -release medium contained in another Reacti-vial by injection through the septum (anesthetic contained in a volume  $< 5\%$  of the reaction volume). The actual concentration of anesthetic in the experimental media was derived from the known volume of the Reacti-vials (1 ml), the liquid volume, the remaining gas volume, and the published values for the liquid/gas partition coefficients for these anesthetics.<sup>21,25</sup> The concentrations of the anesthetics in the liquid phase were determined using the distribution coefficients as described by Nelson and Sweo.<sup>21</sup>

$\text{Ca}^{2+}$  uptake by sarcoplasmic reticulum vesicles in the presence or absence of anesthetic was determined in 0.5 ml buffer composed of 120 mM KCl, 50 mM phosphate,

0.1 mM  $^{45}\text{CaCl}_2$ , 5 mM MgATP, and 40 mM histidine ( $\text{pH}$  7.0) at  $25^\circ\text{C}$ . Sarcoplasmic reticulum vesicles (20  $\mu\text{g}/\text{ml}$ ) were placed on the side of the sealed Reacti-vial, and the anesthetic was added through the septum.  $\text{Ca}^{2+}$  uptake was initiated 10 s later by vortexing this mixture. Samples were filtered through 0.45- $\mu\text{m}$  Millipore HA membranes and washed with ice-cold buffer, and the  $^{45}\text{Ca}^{2+}$  remaining on the filter was determined in a liquid scintillation spectrometer.

To determine sarcoplasmic reticulum  $\text{Ca}^{2+}$  release, vesicles (10–15 mg protein/ml) were first passively loaded with  $^{45}\text{Ca}^{2+}$  to a level of 20–40 nmol/mg<sup>26</sup> by incubation for 2 h at room temperature in 0.1 M KCl, 10 mM PIPES (adjusted to the desired  $\text{pH}$  with KOH), and 5 mM  $\text{CaCl}_2$  (containing 0.1 mCi/ml  $^{45}\text{CaCl}_2$ ).  $\text{Ca}^{2+}$ -release media contained 0.2 ml 0.1 M KCl, 10 mM 1,4-piperazinediethane-sulfonic acid (PIPES) buffer, and a  $\text{CaCl}_2$ -ethylene glycol-bis( $\beta$ -amino-ethyl ether)-N,N,N',N'-tetraacetic acid (EGTA) buffer set to give the desired final  $\text{Ca}^{2+}$  concentration (total  $\text{CaCl}_2$  of 5 mM).  $^{45}\text{Ca}^{2+}$ -loaded sarcoplasmic reticulum vesicles were placed on the side of the release medium-containing vial, and the vial was sealed. Various concentrations of volatile anesthetic were added to the medium by injection through the Teflon seal and allowed to equilibrate for 10 s.  $\text{Ca}^{2+}$  release then was initiated by vortexing. Sarcoplasmic reticulum  $\text{Ca}^{2+}$  release was stopped at various times (2–5 s using a metronome) by the addition of 0.1 M KCl, 10 mM PIPES, 10 mM EGTA, 10 mM  $\text{MgCl}_2$ , and 10  $\mu\text{M}$  ruthenium red through the Teflon seal. The sarcoplasmic reticulum  $\text{Ca}^{2+}$  content was then determined after filtering samples through 0.45- $\mu\text{m}$  Millipore filters and washing with ice-cold medium containing the  $\text{Ca}^{2+}$ -release-inhibiting medium. The fraction of total loaded  $\text{Ca}^{2+}$  that was not releasable was determined 5 s after mixing  $^{45}\text{Ca}^{2+}$ -loaded sarcoplasmic reticulum into 1  $\mu\text{M}$   $\text{Ca}^{2+}$ , 5 mM ATP-containing media (which maximally activates  $\text{Ca}^{2+}$  release). Sarcoplasmic reticulum  $\text{Ca}^{2+}$ -release rates were corrected for the nonreleasable content (approximately 20% of the loaded  $^{45}\text{Ca}^{2+}$ ).

#### STATISTICAL ANALYSIS

All experiments were performed on sarcoplasmic reticulum preparations obtained from at least three different MHS or three normal pigs. Sample means were compared by use of Student's *t* test and considered significantly different at  $P < 0.05$ .

#### Results

##### EFFECT OF VOLATILE ANESTHETICS ON SARCOPLASMIC RETICULUM $\text{Ca}^{2+}$ UPTAKE

To examine the effects of the volatile anesthetics on  $\text{Ca}^{2+}$  uptake by sarcoplasmic reticulum vesicles, it was es-

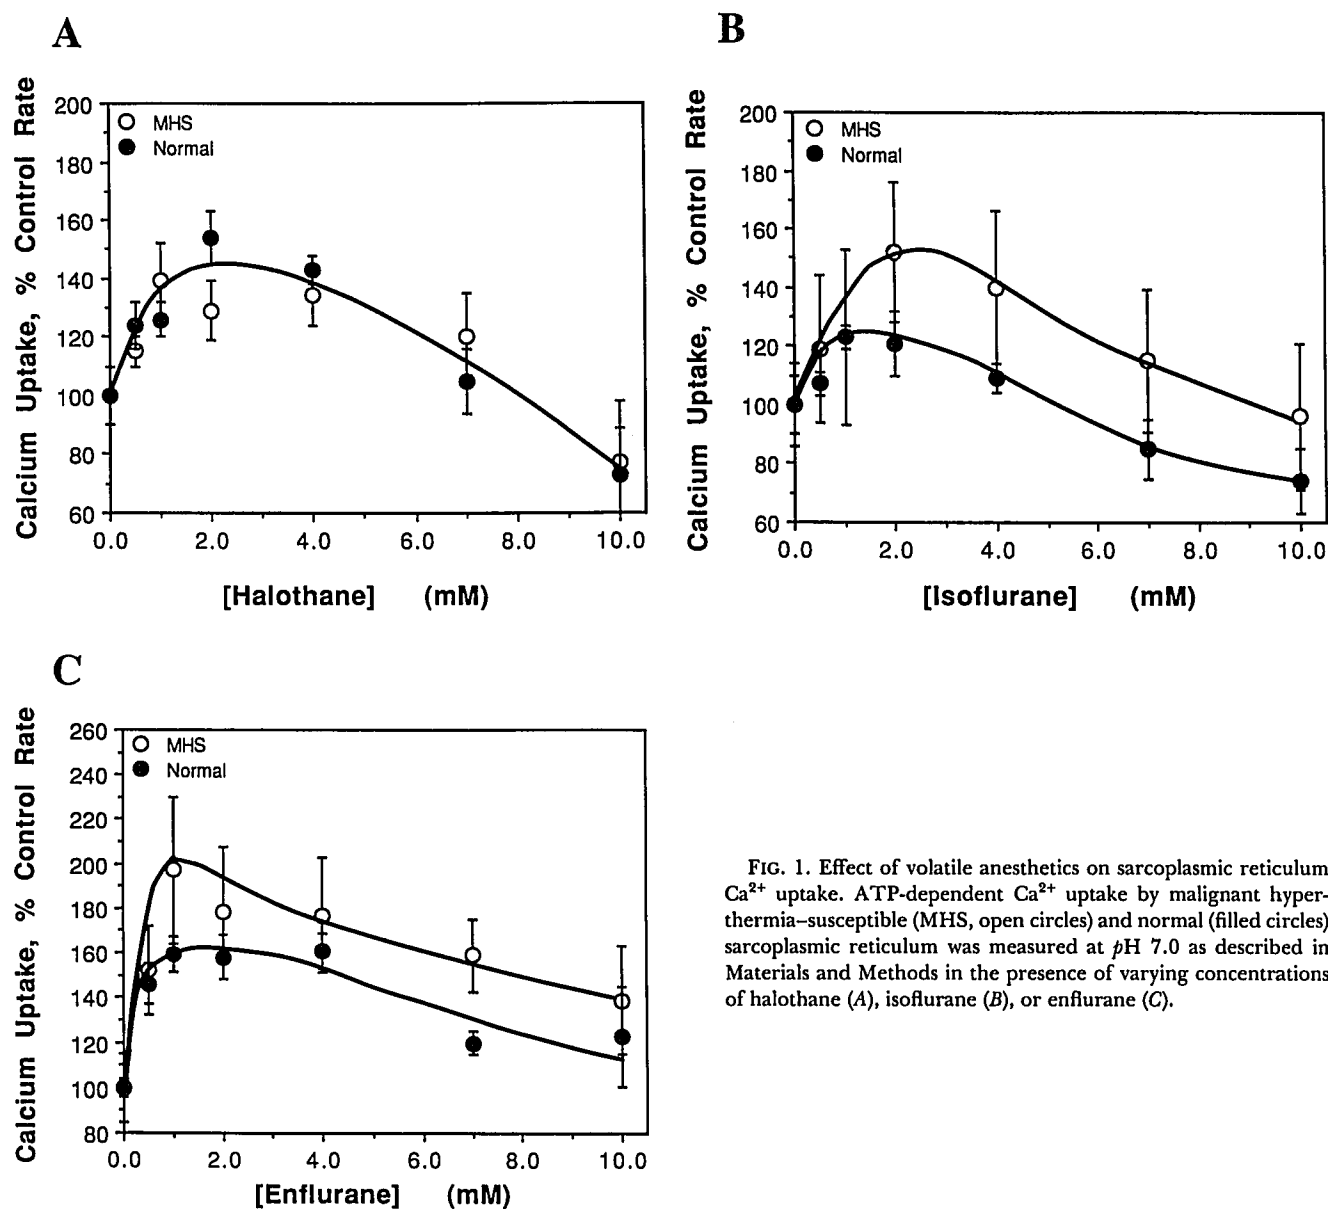

FIG. 1. Effect of volatile anesthetics on sarcoplasmic reticulum  $\text{Ca}^{2+}$  uptake. ATP-dependent  $\text{Ca}^{2+}$  uptake by malignant hyperthermia-susceptible (MHS, open circles) and normal (filled circles) sarcoplasmic reticulum was measured at pH 7.0 as described in Materials and Methods in the presence of varying concentrations of halothane (A), isoflurane (B), or enflurane (C).

essential to ensure that the anesthetics were incubated with the sarcoplasmic reticulum in a sealed environment. The most reliable way to achieve this was to inject the desired volumes of a saturated aqueous solution of anesthetic into the  $\text{Ca}^{2+}$ -uptake medium that itself was contained in a 1 ml Reacti-vial sealed with a Teflon gasket. The unfractionated sarcoplasmic reticulum vesicles used in these studies demonstrated  $\text{Ca}^{2+}$  uptake activities comparable to those previously reported by us for porcine sarcoplasmic reticulum.<sup>26</sup>  $\text{Ca}^{2+}$  uptake by MHS sarcoplasmic reticulum ( $0.66 \pm 0.18 \mu\text{mol Ca}^{2+} \cdot \text{mg protein}^{-1} \cdot \text{min}^{-1}$ ) and normal sarcoplasmic reticulum ( $0.62 \pm 0.13 \mu\text{mol Ca}^{2+} \cdot \text{mg protein}^{-1} \cdot \text{min}^{-1}$ ) did not differ.

When  $\text{Ca}^{2+}$  uptake by sarcoplasmic reticulum was determined in the presence of halothane, isoflurane, or enflurane, the rate of  $\text{Ca}^{2+}$  uptake in the presence of 0.5–4 mM anesthetic was greater than that for the controls that had no anesthetic (figs. 1A–1C). As the concentration of anesthetic was increased further, the relative stimulation of  $\text{Ca}^{2+}$  uptake decreased and eventually reached a level less than (for halothane and isoflurane) or similar to (enflurane) that of the control samples.

When the effect of halothane on MHS and normal sarcoplasmic reticulum  $\text{Ca}^{2+}$  uptake were compared, it was clear that there was no difference in the sensitivity of these two types of sarcoplasmic reticulum to this anesthetic (fig.

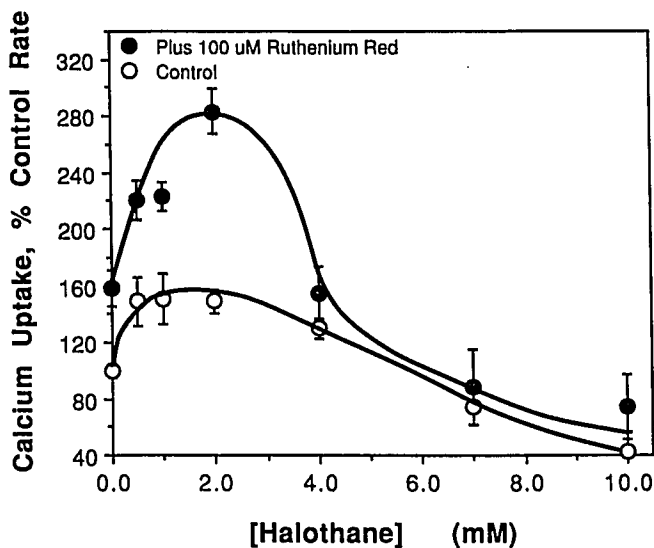

FIG. 2. Effect of ruthenium red on the halothane-induced stimulation of sarcoplasmic reticulum  $\text{Ca}^{2+}$  uptake. ATP-dependent  $\text{Ca}^{2+}$  uptake was measured at pH 7.0 as described in Materials and Methods in the presence (filled circles) or absence (open circles) of 100  $\mu\text{M}$  ruthenium red.

1A). Although both isoflurane and enflurane appeared to stimulate  $\text{Ca}^{2+}$  uptake by MHS sarcoplasmic reticulum to a greater extent than that by normal sarcoplasmic reticulum (figs. 1B and 1C), there were no statistically significant differences between MHS and normal sarcoplasmic reticulum ( $P > 0.05$ ) except for 7 mM enflurane. Most importantly, in the clinically relevant range of 0–0.5 mM anesthetic,<sup>25</sup> the percent stimulation of  $\text{Ca}^{2+}$  uptake by a given anesthetic was identical for MHS and normal sarcoplasmic reticulum.

One concern in the studies described here is that the unfractionated sarcoplasmic reticulum vesicle fraction used still contained a significant proportion of terminal cisternae-derived sarcoplasmic reticulum that is enriched in the  $\text{Ca}^{2+}$ -release channel. Thus, the  $\text{Ca}^{2+}$  accumulation measurements made here reflect a balance between  $^{45}\text{Ca}^{2+}$  uptake by the  $\text{Ca}^{2+}$  pump and  $^{45}\text{Ca}^{2+}$  release via the  $\text{Ca}^{2+}$ -release channel. To obviate this problem, the effect of halothane on ATP-dependent  $^{45}\text{Ca}^{2+}$  uptake was examined in the presence of 100  $\mu\text{M}$  ruthenium red, which completely inhibits the sarcoplasmic reticulum  $\text{Ca}^{2+}$ -release mechanism (data not shown). In the absence of halothane, ruthenium red significantly stimulated  $\text{Ca}^{2+}$  uptake by 58% ( $P < 0.01$ ) (fig. 2); identical results were obtained for MHS and normal sarcoplasmic reticulum, so data are pooled in figure 2. As halothane was added, the relative stimulation of  $\text{Ca}^{2+}$  uptake increased (maximal stimulation of 80% over control values in both the absence and presence of ruthenium red). Halothane stimulated  $\text{Ca}^{2+}$  uptake in either the presence or absence of ruthenium red,

indicating that the effect of volatile anesthetics on  $\text{Ca}^{2+}$  uptake seen in figure 1 was indeed due to the action of these agents on the ATP-dependent  $\text{Ca}^{2+}$ -pump mechanism.

#### EFFECT OF VOLATILE ANESTHETICS ON SARCOPLASMIC RETICULUM $\text{Ca}^{2+}$ RELEASE

Volatile anesthetics can trigger MH crisis in humans and swine when the muscle is in the relaxed state. Thus, the effect of anesthetics on sarcoplasmic reticulum  $\text{Ca}^{2+}$  release *in vitro* was examined in a  $10^{-8}$  M ionized  $\text{Ca}^{2+}$ -containing medium, a  $\text{Ca}^{2+}$  concentration significantly less than that necessary to activate muscle contraction. Under these conditions,  $\text{Ca}^{2+}$  release from both normal and MHS sarcoplasmic reticulum was slow enough to be measured accurately at time intervals of 2 s or more (*i.e.*, the rate of  $\text{Ca}^{2+}$  release was shown to be linear). As with  $\text{Ca}^{2+}$  uptake, sarcoplasmic reticulum  $\text{Ca}^{2+}$  release was measured in a sealed environment to ensure minimal loss of the volatile anesthetics. Furthermore, the  $\text{Ca}^{2+}$ -release protocol used in our study directly measured the release of  $\text{Ca}^{2+}$  from  $^{45}\text{Ca}^{2+}$ -filled passively loaded vesicles (*i.e.*, vesicles that had not been exposed to  $\text{Ca}^{2+}$ -precipitating agents) in which MHS and normal sarcoplasmic reticulum contained similar initial  $\text{Ca}^{2+}$  loads (20–40 nmol/mg).

The rate constant for  $\text{Ca}^{2+}$  release when MHS sarcoplasmic reticulum vesicles were transferred to  $10^{-8}$  M  $\text{Ca}^{2+}$  (pH 7.0) in the absence of halothane was significantly greater than that of normal sarcoplasmic reticulum under the same conditions (fig. 3). Thus, in contrast to normal sarcoplasmic reticulum, even at this low  $\text{Ca}^{2+}$  concentration there appeared to be some  $\text{Ca}^{2+}$ -release channel-mediated  $\text{Ca}^{2+}$  release occurring from MHS sarcoplasmic reticulum vesicles. The rate constant for  $\text{Ca}^{2+}$  release from both MHS and normal vesicles under these conditions was stimulated by halothane (fig. 3, open symbols); the rate constant, which was maximal at approximately 0.5 mM halothane, was significantly different from that in the absence of halothane for both types of vesicles ( $P < 0.005$ ). At any given halothane concentration, the rate constant for  $\text{Ca}^{2+}$  release from MHS sarcoplasmic reticulum was significantly greater than from normal sarcoplasmic reticulum (figs. 3A and 3B).

In contrast, when  $\text{Ca}^{2+}$ -filled vesicles were transferred to a release-inhibiting medium (containing 10 mM  $\text{MgCl}_2$ , 10 mM EGTA, and 10  $\mu\text{M}$  ruthenium red that inhibit  $\text{Ca}^{2+}$  release via the ryanodine receptor<sup>23</sup>), the stimulation of the rate constant for  $\text{Ca}^{2+}$  release by halothane was markedly reduced (fig. 3, filled symbols). Although there was not a complete inhibition of  $\text{Ca}^{2+}$  release by this medium, the maximal stimulation of  $\text{Ca}^{2+}$  release by halothane from both MHS and normal sarcoplasmic reticulum were now similar. These data also indicate that the  $\text{Ca}^{2+}$

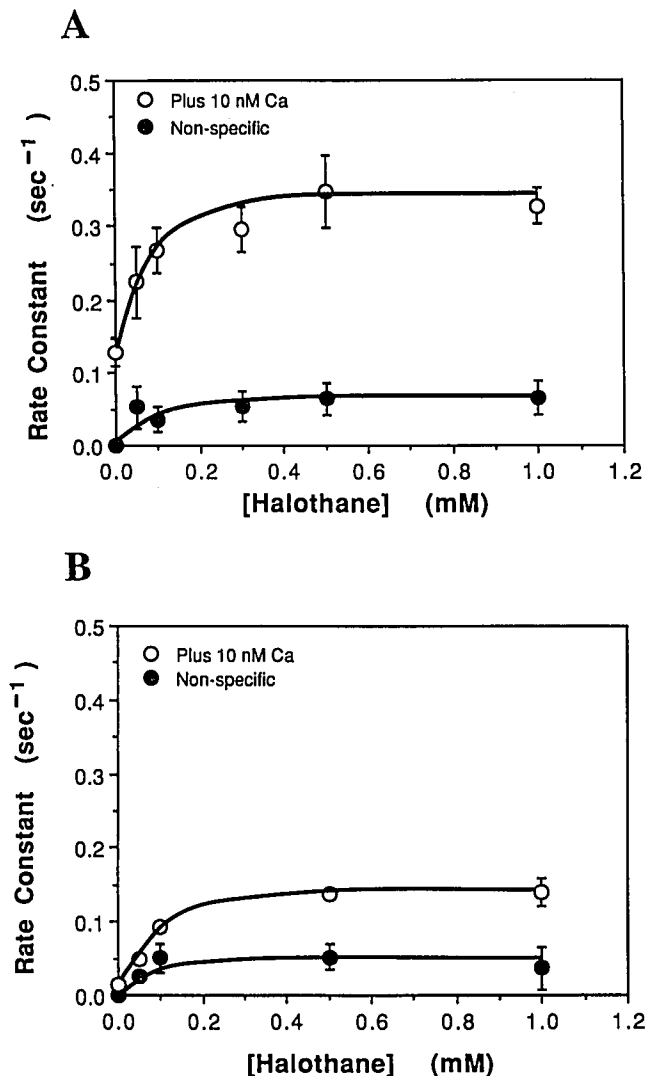

FIG. 3. Effect of halothane on the rate constant of  $\text{Ca}^{2+}$  release from malignant hyperthermia-susceptible (MHS) and normal sarcoplasmic reticulum. MHS (A) and normal (B) sarcoplasmic reticulum were loaded with  $^{45}\text{Ca}^{2+}$ , and  $\text{Ca}^{2+}$  release was determined after dilution into various concentrations of halothane in  $10^{-8}$  M  $\text{Ca}^{2+}$  medium (open circles) or 10 mM  $\text{MgCl}_2$ , 10 mM EGTA, 10  $\mu\text{M}$  ruthenium red release-inhibiting medium (filled circles) as described in Materials and Methods. Points represent the means  $\pm$  SE of duplicate determinations on three MHS and three normal sarcoplasmic reticulum preparations.

release from MHS vesicles in  $10^{-8}$  M  $\text{Ca}^{2+}$  in the absence of halothane is predominantly channel-mediated, because it is inhibited by known inhibitors of the sarcoplasmic reticulum  $\text{Ca}^{2+}$ -release channel.<sup>22,23</sup>

A possible complication with the approach used here is that the time between the addition of halothane to the sealed tube containing the  $^{45}\text{Ca}^{2+}$ -loaded sarcoplasmic reticulum (in a 2- $\mu\text{l}$  volume on the wall of the Reacti-vial vessel) and the initiation of  $\text{Ca}^{2+}$  release could vary from 5–15 s and may not have been sufficient for equilibration

of the anesthetic with the medium. However, when this equilibration time was varied from 5 to 120 s, the stimulation of the rate constant for  $\text{Ca}^{2+}$  release by 0.5 mM halothane was similar. Thus, halothane concentrations were apparently at equilibrium, and  $\text{Ca}^{2+}$  release was activated only after dilution of the vesicles into the anesthetic-containing  $\text{Ca}^{2+}$ -release medium. Although the rapid time scale necessary for these experiments precluded precise confirmation of anesthetic equilibration, anesthetic concentrations reported here assume equilibration with both the aqueous and gas phases in the sealed tube.

Isoflurane and enflurane also enhanced the rate constant for  $\text{Ca}^{2+}$  release from  $^{45}\text{Ca}^{2+}$ -loaded vesicles upon transfer to  $10^{-8}$  M  $\text{Ca}^{2+}$ -containing medium; the rate constants were again greater for MHS than for normal sarcoplasmic reticulum (figs. 4 and 5, open symbols). As with halothane, the anesthetic-induced  $\text{Ca}^{2+}$  release was markedly reduced when vesicles were transferred to the release-inhibiting medium, with the rate constants for  $\text{Ca}^{2+}$  release from MHS and normal sarcoplasmic reticulum now not significantly different (filled symbols).

The anesthetic concentration for the 50% stimulation of  $\text{Ca}^{2+}$  release ( $C_{0.5}$ ) could be accurately determined from Hill plots only for MHS sarcoplasmic reticulum; the stimulation of normal sarcoplasmic reticulum  $\text{Ca}^{2+}$  release by anesthetic was too small to be accurately determined. These  $C_{0.5}$  values ( $0.097 \pm 0.065$  mM halothane,  $0.171 \pm 0.031$  mM isoflurane,  $0.220 \pm 0.049$  mM enflurane, mean  $\pm$  SD for three different MHS sarcoplasmic reticulum samples for each anesthetic) are within the range of anesthetic concentrations (0.1–0.5 mM) that induce contractures in MHS muscle bundles<sup>27</sup> and trigger MH crises *in vivo*.<sup>28</sup>

#### EFFECT OF DANTROLENE ON SARCOPLASMIC RETICULUM $\text{Ca}^{2+}$ RELEASE

Dantrolene has been proposed to inhibit the increase in sarcoplasmic  $\text{Ca}^{2+}$  during an MH episode by acting on the sarcoplasmic reticulum  $\text{Ca}^{2+}$ -release channel.<sup>20,29,30</sup> However, as shown in figure 6A, inclusion of 40  $\mu\text{M}$  dantrolene in the release medium (a concentration that is clinically effective and is close to the maximum solubility of this agent in buffered medium<sup>29</sup>) did not inhibit  $\text{Ca}^{2+}$  release from MHS sarcoplasmic reticulum in either the presence or absence of halothane. Similar results were obtained when 40  $\mu\text{M}$  dantrolene was also included during the 2-h  $^{45}\text{Ca}^{2+}$  loading step (data not shown).

The experiment shown in figure 6A was performed at 22° C. However, Ohta *et al.*<sup>31</sup> have reported that dantrolene inhibited sarcoplasmic reticulum  $\text{Ca}^{2+}$  release in skinned fibers only at 38° C. When our experiment was repeated at 38° C (fig. 6B, adjusting the  $\text{Ca}^{2+}$  EGTA buffer accordingly), there also was no inhibition of sarcoplasmic reticulum  $\text{Ca}^{2+}$  release by 40  $\mu\text{M}$  dantrolene.

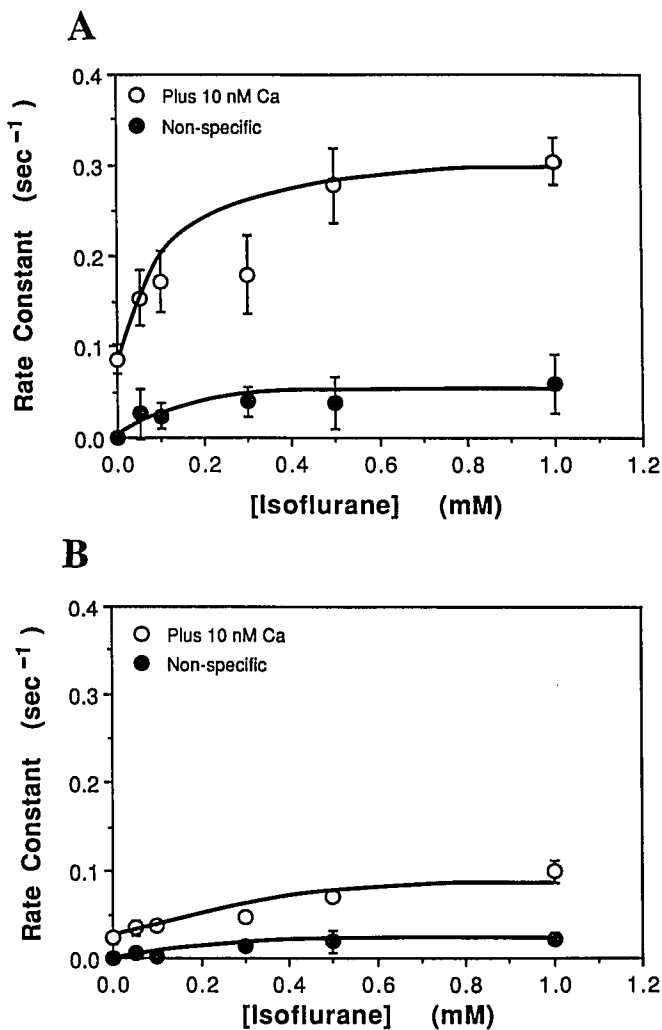

FIG. 4. Effect of isoflurane on the rate constant of  $\text{Ca}^{2+}$  release from malignant hyperthermia-susceptible (MHS) and normal sarcoplasmic reticulum. MHS (A) and normal (B) sarcoplasmic reticulum were loaded with  $^{45}\text{Ca}^{2+}$ , and  $\text{Ca}^{2+}$  release was determined in the presence of varying concentrations of isoflurane in  $10^{-8}$  M  $\text{Ca}^{2+}$  medium (open circles) or 10 mM  $\text{MgCl}_2$ , 10 mM EGTA, 10  $\mu\text{M}$  ruthenium red release-inhibiting medium (filled circles), as described in the legend to figure 3, for three MHS and three normal sarcoplasmic reticulum preparations.

#### pH DEPENDENCE OF THE ANESTHETIC-INDUCED SARCOPLASMIC RETICULUM $\text{Ca}^{2+}$ RELEASE

The rate constant for  $\text{Ca}^{2+}$  release from MHS sarcoplasmic reticulum, induced by transfer of  $^{45}\text{Ca}^{2+}$ -filled vesicles to  $10^{-8}$  M  $\text{Ca}^{2+}$  medium, decreased as the pH was decreased (fig. 7); under these conditions the rate constant for normal sarcoplasmic reticulum  $\text{Ca}^{2+}$  release was already very slow at pH 7.0, so a further decrease was not easily measurable. Although the anesthetic-induced stimulation of  $\text{Ca}^{2+}$  release from both normal and MHS sarcoplasmic reticulum decreased with decreasing pH, the effect of pH on this stimulation was significantly different

for these two types of sarcoplasmic reticulum. At pH less than 6.8, 0.5 mM halothane had no effect on  $\text{Ca}^{2+}$  release from normal sarcoplasmic reticulum (fig. 7B). In contrast, 0.5 mM halothane could significantly stimulate the rate constant for  $\text{Ca}^{2+}$  release from MHS sarcoplasmic reticulum even at pH 6.4 (fig. 7A). With isoflurane (fig. 8) and enflurane (fig. 9), the difference in the response of MHS and normal sarcoplasmic reticulum is even more pronounced. Thus, at pH less than 7.0, both anesthetics had no effect on the rate constant for  $\text{Ca}^{2+}$  release from normal sarcoplasmic reticulum, whereas they were able to stim-

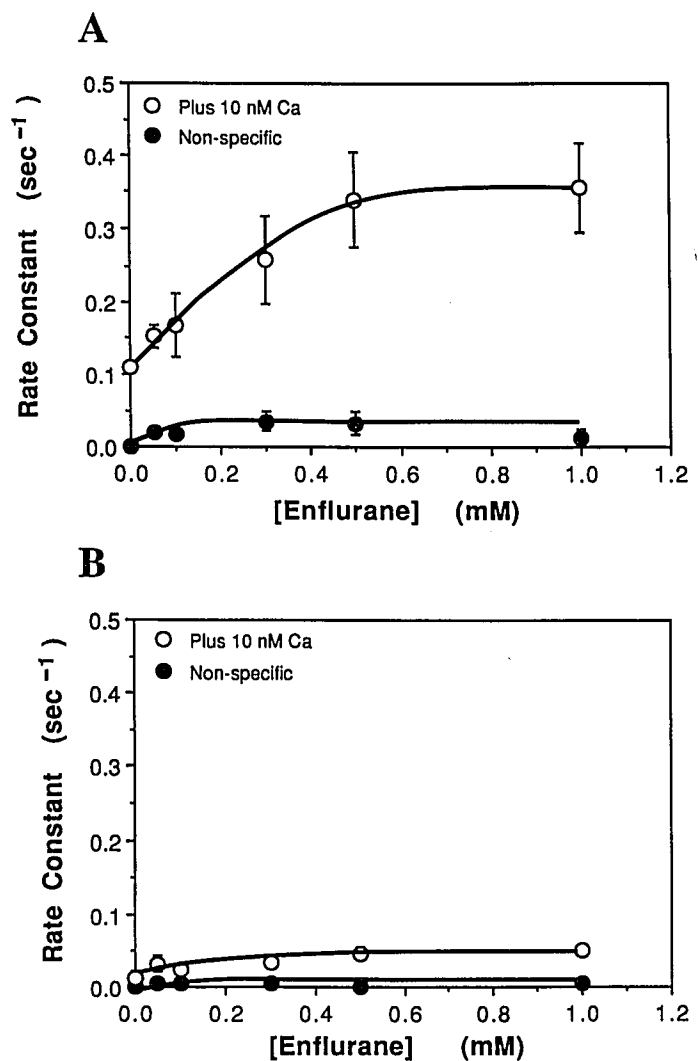

FIG. 5. Effect of enflurane on the rate constant of  $\text{Ca}^{2+}$  release from malignant hyperthermia-susceptible (MHS) and normal sarcoplasmic reticulum. MHS (A) and normal (B) sarcoplasmic reticulum were loaded with  $^{45}\text{Ca}^{2+}$ , and  $\text{Ca}^{2+}$  release was determined in the presence of varying concentrations of enflurane in  $10^{-8}$  M  $\text{Ca}^{2+}$  medium (open circles) or 10 mM  $\text{MgCl}_2$ , 10 mM EGTA, 10  $\mu\text{M}$  ruthenium red release-inhibiting medium (filled circles), as described in the legend to fig. 3, for three MHS and three normal sarcoplasmic reticulum preparations.

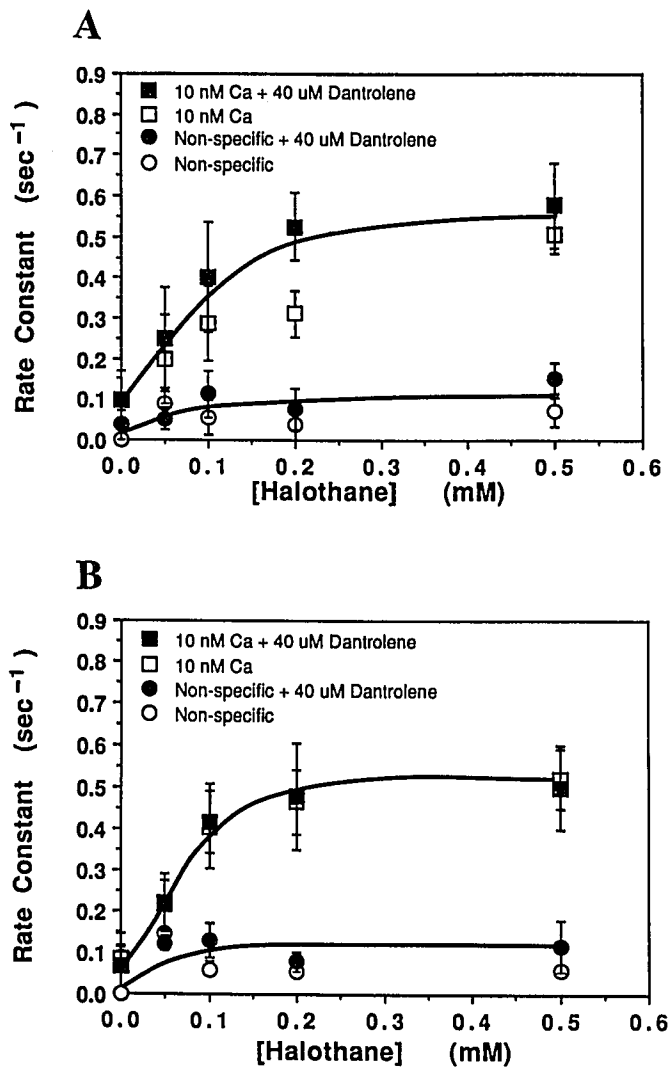

FIG. 6. Effect of dantrolene on the halothane-induced stimulation of  $\text{Ca}^{2+}$  release from malignant hyperthermia-susceptible (MHS) sarcoplasmic reticulum at 22 and 38°C. MHS sarcoplasmic reticulum were loaded with  $^{45}\text{Ca}^{2+}$ , and the rate constant for  $\text{Ca}^{2+}$  release was determined after dilution into various concentrations of halothane in  $10^{-8}$  M  $\text{Ca}^{2+}$  medium (squares) or 10 mM  $\text{MgCl}_2$ , 10 mM EGTA, 10  $\mu\text{M}$  ruthenium red release-inhibiting medium (circles). The release medium included (filled symbols) or omitted (open symbols) 40  $\mu\text{M}$  dantrolene that was added from a 4 mM dantrolene stock solution in dimethyl sulfoxide; an equivalent volume of dimethyl sulfoxide was included in the release media that omitted dantrolene. Experiments were performed at 22°C (A) or 38°C (B).

ulate significantly the rate constant for  $\text{Ca}^{2+}$  release from MHS sarcoplasmic reticulum even at pH 6.4 (figs. 8 and 9).

The halothane dependence of  $\text{Ca}^{2+}$  release from normal and MHS sarcoplasmic reticulum also was examined at pH 6.8 and pH 6.6 (fig. 10). At both pH values, as observed previously at pH 7.0, the stimulation of the rate constants for  $\text{Ca}^{2+}$  release by halothane were maximal by

0.3 mM halothane; *i.e.*, there were no significant differences in the halothane sensitivity at these different pH values. Similar results were obtained with isoflurane and enflurane (data not shown).

### Discussion

Sarcoplasmic  $\text{Ca}^{2+}$  levels in skeletal muscle are determined primarily by the balance of  $\text{Ca}^{2+}$  uptake and  $\text{Ca}^{2+}$  release from the sarcoplasmic reticulum. Therefore, if

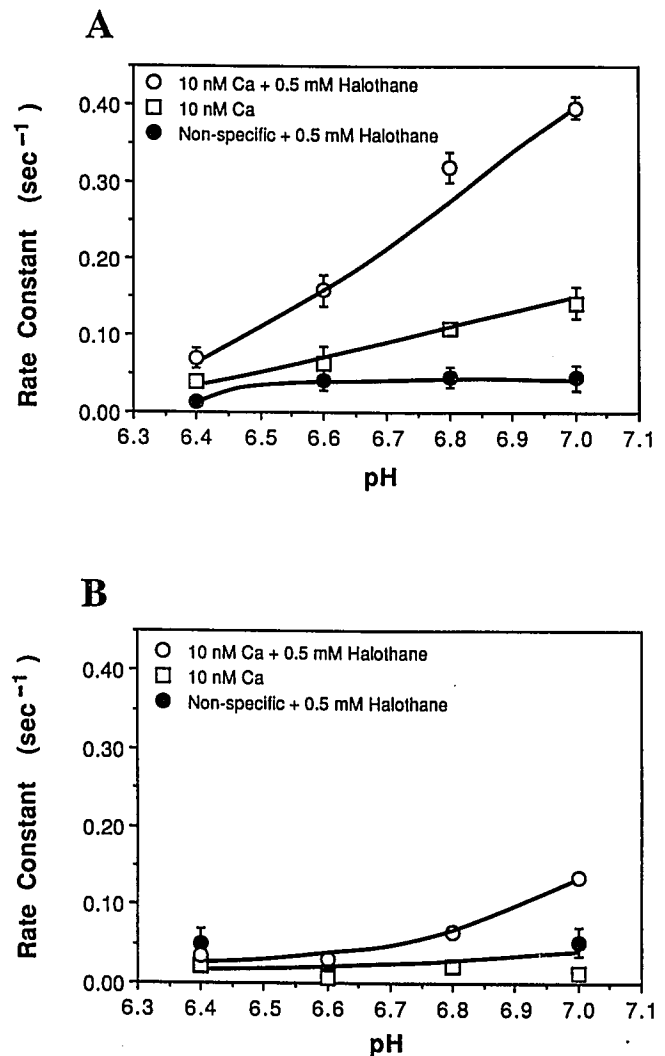

FIG. 7. Effects of pH on the halothane-induced release of  $\text{Ca}^{2+}$  from malignant hyperthermia-susceptible (MHS) and normal sarcoplasmic reticulum. MHS (A) and normal (B) sarcoplasmic reticulum were loaded with  $^{45}\text{Ca}^{2+}$ , and the rate constant for  $\text{Ca}^{2+}$  release was determined after dilution into  $10^{-8}$  M  $\text{Ca}^{2+}$  plus 0.5 mM halothane medium (open circles),  $10^{-8}$  M  $\text{Ca}^{2+}$  medium (open squares), or 10 mM  $\text{MgCl}_2$ , 10 mM EGTA, 10  $\mu\text{M}$  ruthenium red plus 0.5 mM halothane medium (filled circles), as described in Materials and Methods. Points represent the means  $\pm$  SE of duplicate determinations on three MHS and three normal sarcoplasmic reticulum preparations.

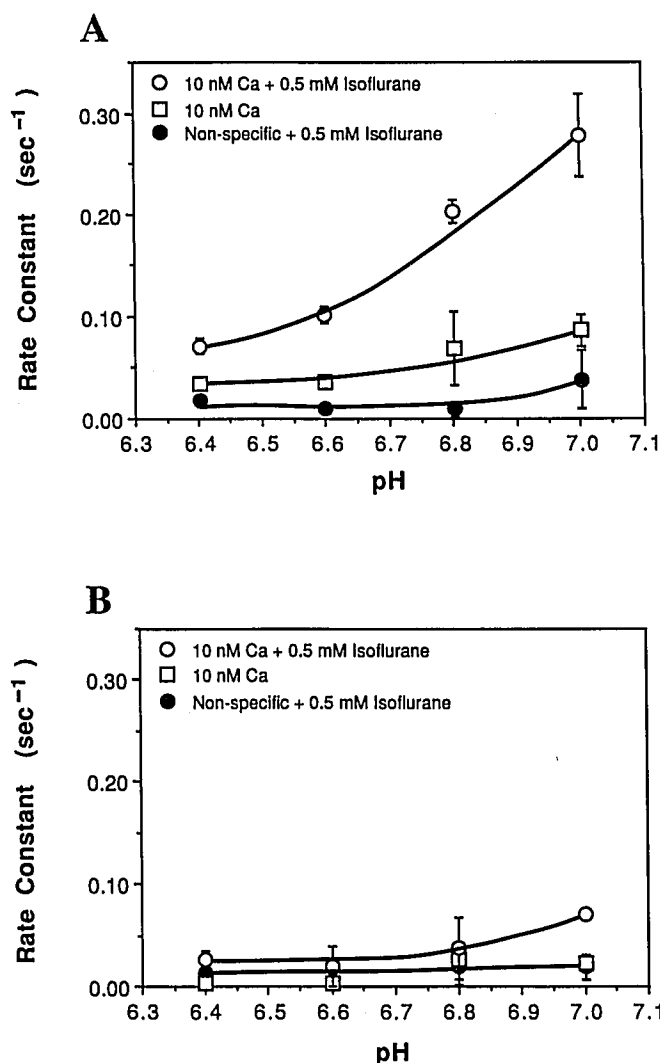

FIG. 8. Effect of pH on the isoflurane-induced release of Ca<sup>2+</sup> from malignant hyperthermia-susceptible (MHS) and normal sarcoplasmic reticulum. MHS (A) and normal (B) sarcoplasmic reticulum were loaded with <sup>45</sup>Ca<sup>2+</sup>, and the rate constant for Ca<sup>2+</sup> release was determined after dilution into 10<sup>-8</sup> M Ca<sup>2+</sup> plus 0.5 mM isoflurane medium (open circles), 10<sup>-8</sup> M Ca<sup>2+</sup> medium alone (open squares), or 10 mM MgCl<sub>2</sub>, 10 mM EGTA, 10 μM ruthenium red plus 0.5 mM isoflurane medium (filled circles), as described in the legend to figure 7 for three MHS and three normal sarcoplasmic reticulum preparations.

the sarcoplasmic reticulum is the site of the primary defect in MHS muscle, it is likely that MH triggering agents, such as the volatile anesthetics, act on a component in this membrane to produce the rapid elevation of sarcoplasmic Ca<sup>2+</sup> that is the hallmark of the MH response.<sup>3,4</sup> Thus, it is important to differentiate between the effect of MH-triggering agents on the Ca<sup>2+</sup> pump from those on the Ca<sup>2+</sup>-release mechanism when determining the mechanism of initiation of MH. Furthermore, because MH can be triggered in the unconscious patient, it is important to demonstrate that any triggering agent can alter

the sarcoplasmic reticulum Ca<sup>2+</sup> permeability at resting sarcoplasmic Ca<sup>2+</sup> concentrations.

At concentrations that trigger the MH response, all three volatile anesthetics examined in this study stimulated ATP-dependent Ca<sup>2+</sup> uptake by sarcoplasmic reticulum vesicles (40–100%, fig. 1). These data are very similar to those reported previously by Nelson and Sweo,<sup>21</sup> who also observed that at 1.4–1.7 MAC (0.8–0.96 mM anesthetic) the effect of enflurane on Ca<sup>2+</sup> uptake was greater than the halothane effect, which in turn was greater than the isoflurane effect. The mean values for the stimulation of

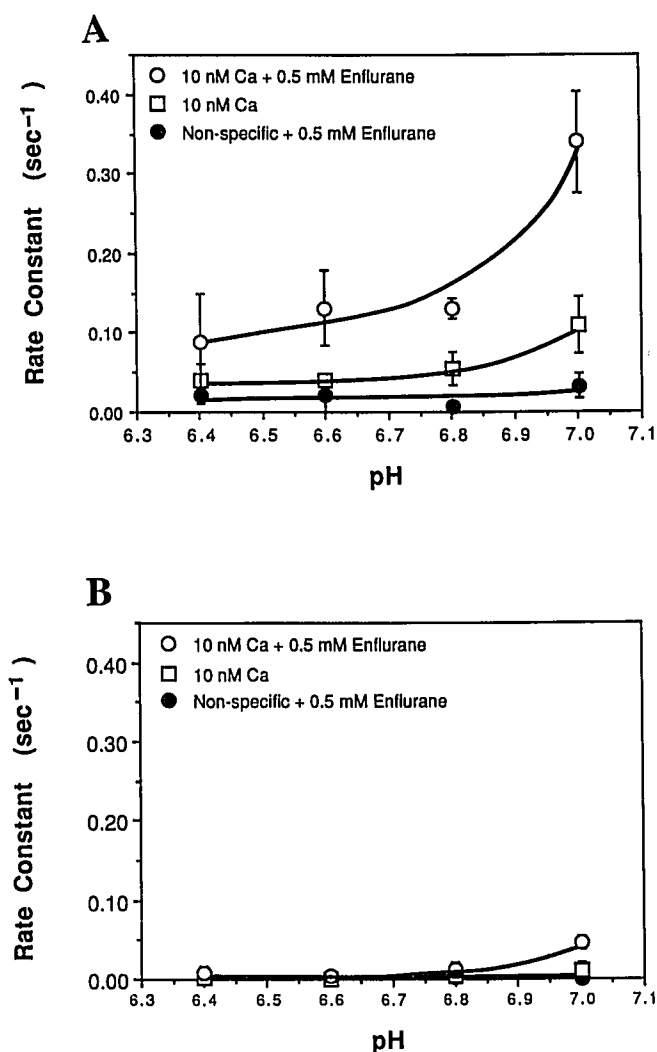

FIG. 9. Effect of pH on the enflurane-induced release of Ca<sup>2+</sup> from malignant hyperthermia-susceptible (MHS) and normal sarcoplasmic reticulum. MHS (A) and normal (B) sarcoplasmic reticulum were loaded with <sup>45</sup>Ca<sup>2+</sup>, and the rate constant for Ca<sup>2+</sup> release was determined after dilution into 10<sup>-8</sup> M Ca<sup>2+</sup> plus 0.5 mM enflurane medium (open circles), 10<sup>-8</sup> M Ca<sup>2+</sup> medium alone (open squares), or 10 mM MgCl<sub>2</sub>, 10 mM EGTA, 10 μM ruthenium red plus 0.5 mM enflurane medium (filled circles), as described in the legend to figure 7 for three MHS and three normal sarcoplasmic reticulum preparations.



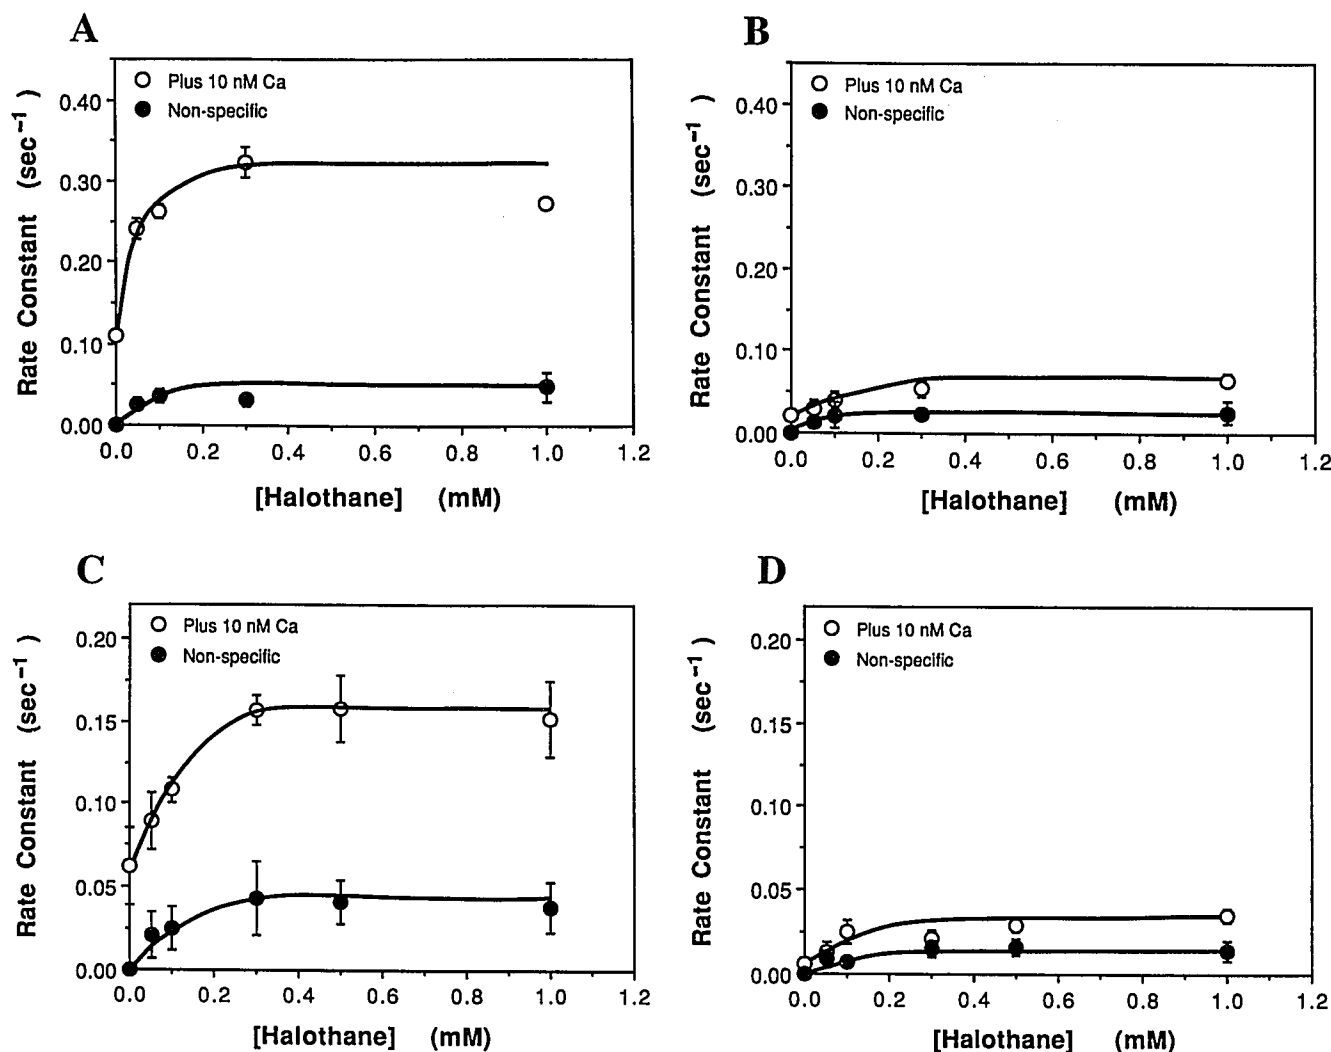

FIG. 10. Effect of halothane on  $\text{Ca}^{2+}$  release from malignant hyperthermia-susceptible (MHS) and normal sarcoplasmic reticulum at pH 6.8 and 6.6. MHS (A, C) and normal (B, D) sarcoplasmic reticulum were loaded with  $^{45}\text{Ca}^{2+}$ , and the rate constant for  $\text{Ca}^{2+}$  release was determined after dilution into various concentrations of halothane in  $10^{-8}$  M  $\text{Ca}^{2+}$  medium (open circles) or 10 mM  $\text{MgCl}_2$ , 10 mM EGTA, 10  $\mu\text{M}$  ruthenium red release-inhibiting medium (filled circles) at either pH 6.8 (A, B) or pH 6.6 (C, D) as described in Materials and Methods. Points represent the means  $\pm$ SE of duplicate determinations on three MHS and three normal sarcoplasmic reticulum preparations.

$\text{Ca}^{2+}$  uptake reported in our study at 0.5 and 1 mM anesthetic exhibits a similar order of effectiveness (figs. 1 and 2); however, with the overlap of standard errors there was no significant difference between the three anesthetics. There are a number of previous reports of agents that can stimulate sarcoplasmic reticulum  $\text{Ca}^{2+}$  uptake (up to 2-fold); these include the volatile anesthetic diethyl ether (5%)<sup>32</sup> and dimethyl sulfoxide (20%).<sup>33</sup> These effects have been explained as due in part to an increase in sarcoplasmic reticulum intravesicular volume and altered lipid-protein interactions that permit faster translocation of  $\text{Ca}^{2+}$ .<sup>32,34</sup> A similar mechanism of action is likely responsible for the actions of the volatile anesthetics on  $\text{Ca}^{2+}$  uptake reported in the present study.

Studies that have measured the effects of volatile anesthetic on sarcoplasmic reticulum have reported both stimulation<sup>18,35-37</sup> and inhibition<sup>18,19,38,39</sup> of ATP-dependent  $\text{Ca}^{2+}$  uptake; in studies with up to 2 mM halothane, there is a trend for this agent to stimulate  $\text{Ca}^{2+}$  uptake, whereas halothane concentrations greater than 5 mM tend to inhibit  $\text{Ca}^{2+}$  uptake. This agrees with our results (fig. 3) and those of Nelson and Sweo,<sup>21</sup> although the latter authors proposed that concentrations of anesthetic that stimulated the pump did so by interacting directly with this enzyme, whereas the higher concentrations that inhibited  $\text{Ca}^{2+}$  uptake had a general perturbation effect on the lipid portion of the sarcoplasmic reticulum membrane. Irrespective of the mechanism responsible for the inhi-

bition of sarcoplasmic reticulum  $\text{Ca}^{2+}$  uptake by volatile anesthetics, this inhibition occurs only at anesthetic concentrations that are 10–20 times the clinically effective concentrations. Thus, they cannot account for the demonstrated ability of clinical concentrations of these agents to trigger the MH response by producing a sustained elevation of sarcoplasmic  $\text{Ca}^{2+}$  concentration. Most importantly, our studies demonstrate that the effects of halothane, isoflurane, and enflurane on ATP-dependent  $\text{Ca}^{2+}$  uptake by MHS and normal sarcoplasmic reticulum are not significantly different. This would support our<sup>26</sup> and others<sup>37</sup> previous conclusion that there is no defect in the sarcoplasmic reticulum  $\text{Ca}^{2+}$  pump in MHS muscle.

Although a clinical effect of these anesthetic agents on the sarcoplasmic reticulum  $\text{Ca}^{2+}$  pump might be to enhance muscle relaxation, our data demonstrates that the opposite is true for the sarcoplasmic reticulum  $\text{Ca}^{2+}$ -release channel. As reported by Nelson and Sweo,<sup>21</sup> all three volatile anesthetics stimulated  $\text{Ca}^{2+}$  release from  $\text{Ca}^{2+}$ -filled sarcoplasmic reticulum vesicles at concentrations that were 10–20 times lower than those required to inhibit ATP-dependent  $\text{Ca}^{2+}$  uptake. Indeed, the concentrations of anesthetics affecting the sarcoplasmic reticulum  $\text{Ca}^{2+}$ -release channel are in the clinically relevant range and are below most reported values for the effect of these agents on other membrane channels and pumps. The far lower effective concentration would more logically argue for a direct interaction between the volatile anesthetics and the sarcoplasmic reticulum ryanodine receptor  $\text{Ca}^{2+}$ -release channel protein and not the  $\text{Ca}^{2+}$  pump. That the  $\text{Ca}^{2+}$  release measured in this study is primarily mediated by the 540-kD ryanodine receptor protein is demonstrated by the very low rate of  $\text{Ca}^{2+}$  release in the presence of the channel inhibitors ruthenium red,  $\text{Mg}^{2+}$ , and EGTA. Furthermore, anesthetic-induced,  $\text{Ca}^{2+}$ -channel blocker-inhibitable  $\text{Ca}^{2+}$  release was not observed in a light sarcoplasmic reticulum fraction lacking the ryanodine receptor protein (data not shown). The anesthetic-induced nonspecific  $\text{Ca}^{2+}$  release seen in heavy sarcoplasmic reticulum, however, could contribute *in vivo* to triggering a greater  $\text{Ca}^{2+}$  release *via* the  $\text{Ca}^{2+}$ -release channel.

A major finding of the present study is that volatile anesthetics stimulated the sarcoplasmic reticulum  $\text{Ca}^{2+}$ -release channel at a  $\text{Ca}^{2+}$  concentration ( $10^{-8}$  M) that would be expected to maintain this channel in the closed state. Although Ohnishi *et al.*<sup>20</sup> have reported previously (with an indirect measurement of  $\text{Ca}^{2+}$  release) that halothane is unable to stimulate sarcoplasmic reticulum  $\text{Ca}^{2+}$  release even in the presence of  $10^{-7}$  M  $\text{Ca}^{2+}$ , our own previous study that directly examined  $\text{Ca}^{2+}$  release from  $^{45}\text{Ca}^{2+}$ -filled vesicles demonstrated a significant halothane-stimulation of sarcoplasmic reticulum  $\text{Ca}^{2+}$  release in  $10^{-7}$  M  $\text{Ca}^{2+}$  medium.<sup>26</sup> These differences likely reflect differences in the procedures used to measure sarcoplasmic re-

ticulum  $\text{Ca}^{2+}$  release. Our data also demonstrate that in addition to stimulating sarcoplasmic reticulum  $\text{Ca}^{2+}$  release in  $10^{-8}$  M  $\text{Ca}^{2+}$  medium, these volatile anesthetics induce a significantly greater rate of  $\text{Ca}^{2+}$  release from MHS than from normal sarcoplasmic reticulum. If extrapolated to an *in vivo* situation, this could explain how volatile anesthetics are able to effect the MH-triggering elevation of sarcoplasmic  $\text{Ca}^{2+}$  concentration in the sedated individual in whom the musculature is in the relaxed state; *i.e.*, myoplasmic  $\text{Ca}^{2+}$  concentration is  $\leq 10^{-7}$  M. Thus, like our several previous studies documenting an enhanced  $\text{Ca}^{2+}$  release induced by a variety of ligands that are known to regulate this channel protein,<sup>5,6,26,40</sup> the MHS  $\text{Ca}^{2+}$ -release channel is more sensitive to clinical concentrations of volatile anesthetic (*i.e.*, releases a greater fraction of stored  $\text{Ca}^{2+}$ ) than the normal channel.

That  $\text{Ca}^{2+}$  release from sarcoplasmic reticulum vesicles and single-channel activity is inhibited as the pH is lowered has now been well documented.<sup>22,41</sup> However, our data are the first to demonstrate that a decrease in pH not only inhibits the sarcoplasmic reticulum  $\text{Ca}^{2+}$ -release channel, but it also influences the ability of anesthetics to stimulate this channel. Notably, below pH 6.8 in normal sarcoplasmic reticulum, the  $\text{Ca}^{2+}$ -release channel is essentially completely inhibited in either the presence or absence of a volatile anesthetic. In contrast, the MHS  $\text{Ca}^{2+}$ -release channel still can be activated by these anesthetics at pH values as low as 6.4. This has interesting implications for the etiology of an MH episode: the acidosis that accompanies the MH response *in vivo* may not be sufficient to counteract completely the anesthetic-induced stimulation of  $\text{Ca}^{2+}$  release *via* the MHS sarcoplasmic reticulum  $\text{Ca}^{2+}$ -release channel. In contrast, in normal muscle, even if the addition of a volatile anesthetic is able to induce  $\text{Ca}^{2+}$  release, producing a small elevation in sarcoplasmic  $\text{Ca}^{2+}$ , the accompanying fall in pH (resulting from the  $\text{Ca}^{2+}$ -dependent activation of glycogenolysis and glycolysis) will in turn inhibit the  $\text{Ca}^{2+}$ -release channel, allowing the sarcoplasmic reticulum  $\text{Ca}^{2+}$  pump to return sarcoplasmic  $\text{Ca}^{2+}$  to resting levels.

Our inability to demonstrate an inhibition of  $\text{Ca}^{2+}$  release from sarcoplasmic reticulum vesicles by dantrolene leaves unresolved the question of this important therapeutic agent's site of action in skeletal muscle. Other studies have reported that dantrolene either has no effect<sup>11</sup> or inhibits sarcoplasmic reticulum  $\text{Ca}^{2+}$  release.<sup>20,31,42</sup> In agreement with our results reported here, dantrolene has no effect on the single-channel activity of the sarcoplasmic reticulum  $\text{Ca}^{2+}$ -release channel in lipid bilayers. Interestingly, it has been proposed that this drug may act by inhibiting charge movement by the T tubule voltage sensor.<sup>43,44</sup>

§ Fill M: Personal communication.

In concluding that the increase in sarcoplasmic  $\text{Ca}^{2+}$  triggered by volatile anesthetics in MH muscle is due to the action of these agents on the sarcoplasmic reticulum  $\text{Ca}^{2+}$ -release channel, it is necessary to explain how this can be reconciled with the ability of similar concentrations of these same anesthetics to stimulate ATP-dependent sarcoplasmic reticulum  $\text{Ca}^{2+}$  uptake. The most likely explanation is that in intact muscle, where  $\text{Ca}^{2+}$  uptake by the sarcoplasmic reticulum is not massively stimulated by oxalate, phosphate, or pyrophosphate (as used in isolated sarcoplasmic reticulum ATP-dependent  $\text{Ca}^{2+}$  uptake studies<sup>18</sup>),  $\text{Ca}^{2+}$  release *via* the  $\text{Ca}^{2+}$ -release channel is much more rapid than  $\text{Ca}^{2+}$  uptake by the ATP-dependent  $\text{Ca}^{2+}$  pump. The  $\text{Ca}^{2+}$  pump would be active, consuming ATP, but as long as the  $\text{Ca}^{2+}$ -release channel was held in the open state by the volatile anesthetic, myoplasmic  $\text{Ca}^{2+}$  would remain elevated. This would contribute to the lactic acidosis that accompanies the MH response<sup>1,2</sup> as glycolysis attempted to maintain sarcoplasmic ATP levels in the face of sustained ATP hydrolysis by the sarcoplasmic reticulum ATP-dependent  $\text{Ca}^{2+}$  pump.

Additional studies are necessary to determine the significance of our observations with isolated vesicles to the clinical effects of halothane, isoflurane, and enflurane *in vivo*. However, our studies clearly document that the interaction of volatile anesthetics with the sarcoplasmic reticulum  $\text{Ca}^{2+}$ -release channel is altered in MH. Ongoing studies in our laboratory are attempting to define whether this is due to an interaction with the  $\text{Ca}^{2+}$ -release channel protein itself or rather with components of the lipid bilayer that in turn influence the permeability of this channel protein.

The authors thank Dr. William E. Rempel for the pigs used in this study and the secretarial staff of Veterinary Biology for their efficient and accurate typing of the manuscript.

### References

1. Gronert GA: Malignant hyperthermia, Myology. Edited by Engel AG, Banker BQ. Minneapolis, McGraw-Hill Publications, 1986, pp 1763-1784
2. Gronert GA, Mott J, Lee J: Aetiology of malignant hyperthermia. *Br J Anaesth* 60:253-267, 1988
3. Lopez JR, Allen PD, Alamo L, Jones D, Sreter F: Myoplasmic free  $[\text{Ca}^{2+}]$  during a malignant hyperthermia episode in swine. *Muscle Nerve* 11:82-88, 1988
4. Iaizzo PA, Klein W, Lehmann-Horn F: Fura-2 detected myoplasmic calcium and its correlation with contracture force in skeletal muscle from normal and malignant hyperthermia susceptible pigs. *Pflugers Arch* 411:648-653, 1988
5. Mickelson JR, Gallant EM, Litterer LA, Johnson KM, Rempel WE, Louis CF: Abnormal sarcoplasmic reticulum ryanodine receptor in malignant hyperthermia. *J Biol Chem* 263:9310-9315, 1988
6. Mickelson JR, Gallant EM, Rempel WE, Johnson KM, Litterer LA, Jacobson BA, Louis CF: Effects of the halothane-sensitivity gene on sarcoplasmic reticulum function. *Am J Physiol* 257: C787-794, 1989
7. Fill M, Coronado R, Mickelson JR, Vilven J, Ma J, Jacobson BA, Louis CF: Abnormal ryanodine receptor channels in malignant hyperthermia. *Biophys J* 50:471-475, 1990
8. Ohnishi ST, Taylor S, Gronert GA: Calcium-induced  $\text{Ca}^{2+}$  release from sarcoplasmic reticulum of pigs susceptible to malignant hyperthermia. *FEBS Lett* 161:103-107, 1983
9. Nelson TE: Abnormality in calcium release from skeletal muscle sarcoplasmic reticulum of pigs susceptible to malignant hyperthermia. *J Clin Invest* 72:862-870, 1983
10. Kim DH, Sreter FA, Ohnishi ST, Ryan JF, Roberts J, Allen PD, Meszaros LG, Antonui B, Ikemoto N: Kinetic studies of  $\text{Ca}^{2+}$  release from sarcoplasmic reticulum of normal and malignant hyperthermia susceptible pig muscles. *Biochim Biophys Acta* 775:320-327, 1984
11. Nelson TE: Dantrolene does not block calcium pulse-induced calcium release from a putative calcium channel in sarcoplasmic reticulum from malignant hyperthermia and normal pig muscle. *FEBS Lett* 167:123-126, 1984
12. Fill M, Stefani E, Nelson TE: Abnormal human sarcoplasmic reticulum  $\text{Ca}^{2+}$  release channels in malignant hyperthermia skeletal muscle. *Biophys J* 59:1085-1090, 1991
13. MacLennan DH, Duff C, Zorzato F, Fujii J, Phillips M, Korneluk RG, Frodis W, Britt BA, Worton RG: Ryanodine receptor gene is a candidate for predisposition to malignant hyperthermia. *Nature (London)* 343:559-561, 1990
14. McCarthy TV, Healy JMS, Heffron JJA, Lehane M, Deufel T, Lehmann-Horn F, Farrall M, Johnson K: Localization of the malignant hyperthermia susceptibility locus to human chromosome 19q12-13.2. *Nature (London)* 343:562-564, 1990
15. Harbitz I, Chowdhary B, Thomsen PD, Davies W, Kaufmann U, Kran S, Gustavsson I, Christensen K, Hauge JG: Assignment of the porcine calcium release channel gene, a candidate for the malignant hyperthermia locus, to the 6p11-q21 segment of chromosome 6. *Genomics* 8:243-248, 1990
16. Fujii J, Otsu K, Zorzato F, DeLeon S, Khanna VK, Weiler JE, O'brian PJ, MacLennan DH: Identification of a mutation in porcine ryanodine receptor associated with malignant hyperthermia. *Nature (London)* 253:448-451, 1991
17. Levitt RC, Nouri N, Jedlicka AE, McKusick VA, Marks AR, Shuck JG, Fletcher JE, Rosenberg H, Meyers DA: Evidence for genetic heterogeneity in malignant hyperthermia susceptibility. *Genomics* 11:543-547, 1991
18. Gronert GA, Heffron JJA, Taylor SR: Skeletal muscle sarcoplasmic reticulum in porcine malignant hyperthermia. *Eur J Pharmacol* 58:179-187, 1979
19. Blanck TJ, Gruener R, Suffecool SL, Thompson M: Calcium uptake by isolated sarcoplasmic reticulum: Examination of halothane inhibition, pH dependence, and  $\text{Ca}^{2+}$  dependence of normal and malignant hyperthermic human muscle. *Anesth Analg* 60:492-498, 1981
20. Ohnishi ST, Waring AJ, Fang S-RG, Horiuchi K, Flick JL, Sadanaga KK, Ohnishi T: Abnormal membrane properties of the sarcoplasmic reticulum of pigs susceptible to malignant hyperthermia: Modes of action of halothane, caffeine, dantrolene, and two other drugs. *Arch Biochem Biophys* 247:294-301, 1986
21. Nelson TE, Sweo T:  $\text{Ca}^{2+}$  uptake and  $\text{Ca}^{2+}$  release by skeletal muscle sarcoplasmic reticulum: Differing sensitivity to inhalational anesthetics. *ANESTHESIOLOGY* 69:571-577, 1988
22. Meissner G: Adenine nucleotide stimulation of  $\text{Ca}^{2+}$ -induced  $\text{Ca}^{2+}$

- release in sarcoplasmic reticulum. *J Biol Chem* 259:2365-2374, 1984
23. Meissner G, Darling E, Eveleth J: Kinetics of rapid  $\text{Ca}^{2+}$  release by sarcoplasmic reticulum: Effects of  $\text{Ca}^{2+}$ ,  $\text{Mg}^{2+}$ , and adenine nucleotides. *Biochemistry* 25:236-244, 1986
24. McGrath CJ, Rempel WE, Addis PB, Crimi AJ: Acepromazine and droperidol inhibition of halothane-induced malignant hyperthermia (porcine stress syndrome) in swine. *Am J Vet Res* 42:195-198, 1981
25. Firestone LL, Miller JC, Miller KW: Tables of physical and pharmacological properties of anesthetics, *Molecular and Cellular Mechanisms of Anesthetics*. Edited by Rotti SH, Miller KW. New York, Plenum Publishing, 1986, pp 455-470
26. Mickelson JR, Ross JA, Reed BK, Louis CF: Enhanced  $\text{Ca}^{2+}$ -induced calcium release by isolated sarcoplasmic reticulum vesicles from malignant hyperthermia susceptible pig muscle. *Biochim Biophys Acta* 862:318-328, 1986
27. Britt BA: Muscle assessment of malignant hyperthermia patients, *Malignant Hyperthermia*. Edited by Britt BA. Boston, Martinus Nijhoff, 1987, pp 193-267
28. Lerman J, Relton JES: Anesthesia for malignant hyperthermia susceptible patients, *Malignant Hyperthermia*. Edited by Britt BA, Boston, Martinus Nijhoff Publishing, 1987, pp 369-392
29. Britt BA: Dantrolene: An update, *Malignant Hyperthermia*. Edited by Britt BA. Boston, Martinus Nijhoff, 1987, pp 325-367
30. Lopez JR, Medina P, Alamo L: Dantrolene sodium is able to reduce the resting ionic  $[\text{Ca}^{2+}]_i$  in muscle from humans with malignant hyperthermia. *Muscle Nerve* 10:77-79, 1987
31. Ohta T, Ito S, Ohga A: Inhibitory action of dantrolene on  $\text{Ca}^{2+}$  release from sarcoplasmic reticulum in guinea pig skeletal muscle. *Eur J Pharmacol* 178:11-19, 1990
32. Salama G, Inesi A: Mode of action of diethyl ether on ATP dependent  $\text{Ca}^{2+}$  transport by sarcoplasmic reticulum vesicles. *Biochem Pharmacol* 32:3465-3477, 1983
33. The R, Hasselbach W: Stimulatory and inhibitory effects of dimethyl sulfoxide and ethylene glycol on ATPase activity and calcium transport of sarcoplasmic reticulum. *Eur J Biochem* 74: 611-621, 1977
34. Bigelow DJ, Thomas DD: Rotational dynamics of lipid and  $\text{Ca}^{2+}$ -ATPase in sarcoplasmic reticulum. *J Biol Chem* 262:13449-13456, 1987
35. Isaacs H, Heffron JJA: Morphological and biochemical defects in muscles of human carriers of the malignant hyperthermia syndrome. *Br J Anaesth* 47:475-480, 1975
36. Britt BA, Kalow W, Gordon A, Humphrey JG, Rewcastle NB: Malignant hyperthermia-an investigation of five patients. *Can Anaesth Soc J* 20:431-467, 1973
37. Nelson TE, Jones EW, Venable JH, Kerr DD: Malignant hyperthermia of Poland China swine: Studies of a myogenic etiology. *ANESTHESIOLOGY*: 36:52-56, 1972
38. Diamond EM, Berman MC: Effect of halothane on the stability of  $\text{Ca}^{2+}$  transport activity of isolated fragmented sarcoplasmic reticulum. *Biochem Pharmacol* 29:375-381, 1980
39. Dhalla NS, Sulakhe PV, Clinch NF, Wode JG, Naimark A: Influence of fluothane on calcium accumulation by the heavy microsomal fraction of human skeletal muscle: Comparison with a patient with malignant hyperthermia. *Biochem Med Metab Biol* 6:333-343, 1972
40. Mickelson JR, Litterer LA, Jacobson BA, Louis CF: Stimulation and inhibition of  $[\text{^3H}]$ ryanodine binding to sarcoplasmic reticulum from malignant hyperthermia susceptible pigs. *Arch Biochem Biophys* 278:251-257, 1990
41. Rousseau E, Pinkos J: pH modulates conducting and gating behavior of single calcium release channels. *Pflugers Arch* 415: 645-647, 1990
42. Van Winkle WB: Calcium release from skeletal muscle sarcoplasmic reticulum: Site of action of dantrolene sodium? *Science* 193: 1130-1131, 1976
43. Hui CS: Pharmacological studies of charge movement in frog skeletal muscle. *J Physiol (Lond)* 337:509-529, 1983
44. Morgan KC, Bryant SH: The mechanism of action of dantrolene sodium. *J Pharmacol Exp Ther* 201:138-147, 1977
